# Supplementary material
Source: MDPI journal article supplement (https://www.mdpi.com/1999-4907/14/1/142)
Supplement: s1 [file s1]

## Article

# Potential and Constraints on In Vitro Micropropagation of *Juniperus drupacea* Labill.

Kostas Ioannidis <sup>1,\*</sup>, Ioanna Tomprou <sup>1</sup>, Danae Panayiotopoulou<sup>2</sup>, Stefanos Boutsios<sup>3</sup> and Evangelia N. Daskalakou<sup>3</sup>

<sup>1</sup> Laboratory of Sylviculture, Forest Genetics and Biotechnology, Institute of Mediterranean and Forest Ecosystems, Hellenic Agricultural Organization “DIMITRA”, Ilissia, 11528 Athens, Greece

<sup>2</sup> Library and Documentation Center, Institute of Mediterranean & Forest Ecosystems, Hellenic Agricultural Organization “DIMITRA”, Ilissia, 11528 Athens, Greece

<sup>3</sup> Laboratory Forest Management & Forest Economics, Institute of Mediterranean & Forest Ecosystems, Hellenic Agricultural Organization “DIMITRA”, Ilissia, 11528 Athens, Greece

\* Correspondence: ioko@fria.gr; Tel.: +30-210-7783-750 (K.I.)

**Table S1.** Effect of medium and plant growth regulator types and their concentrations on the average percentage of blastogenesis (%) of *Juniperus drupacea* explants in relation to their gender. (Means followed by the same letter do not differ statistically at  $p \leq 0.05$  according to the Duncan test.)

| Female explants          |    |                      | Male explants            |    |                      |
|--------------------------|----|----------------------|--------------------------|----|----------------------|
| Medium and PGR treatment | N  | (%)                  | Medium and PGR treatment | N  | (%)                  |
| DKW + 4 $\mu$ M mT       | 24 | 54.17 <sup>a</sup>   | DKW + 4 $\mu$ M BA       | 24 | 62.50 <sup>a</sup>   |
| DKW + 4 $\mu$ M TDZ      | 24 | 54.17 <sup>a</sup>   | DKW + 4 $\mu$ M TDZ      | 24 | 58.33 <sup>ab</sup>  |
| WPM + 4 $\mu$ M mT       | 24 | 54.17 <sup>a</sup>   | DKW + 8 $\mu$ M mT       | 24 | 54.17 <sup>abc</sup> |
| WPM + 4 $\mu$ M BA       | 24 | 54.17 <sup>a</sup>   | DKW + 4 $\mu$ M mT       | 24 | 54.17 <sup>abc</sup> |
| DKW + 8 $\mu$ M mT       | 24 | 50.00 <sup>ab</sup>  | WPM + 4 $\mu$ M mT       | 24 | 54.17 <sup>abc</sup> |
| DKW + 4 $\mu$ M BA       | 24 | 50.00 <sup>ab</sup>  | WPM + 8 $\mu$ M mT       | 24 | 50.00 <sup>abc</sup> |
| WPM + 8 $\mu$ M mT       | 24 | 50.00 <sup>ab</sup>  | WPM + 4 $\mu$ M TDZ      | 24 | 50.00 <sup>abc</sup> |
| MS + 8 $\mu$ M BA        | 24 | 50.00 <sup>ab</sup>  | MS + 4 $\mu$ M BA        | 24 | 50.00 <sup>abc</sup> |
| DKW + 8 $\mu$ M BA       | 24 | 45.83 <sup>abc</sup> | DKW + 8 $\mu$ M BA       | 24 | 45.83 <sup>abc</sup> |
| WPM + 4 $\mu$ M TDZ      | 24 | 45.83 <sup>abc</sup> | WPM + 8 $\mu$ M TDZ      | 24 | 45.83 <sup>abc</sup> |
| WPM + 8 $\mu$ M BA       | 24 | 45.83 <sup>abc</sup> | WPM + 4 $\mu$ M BA       | 24 | 45.83 <sup>abc</sup> |
| MS + 4 $\mu$ M mT        | 24 | 45.83 <sup>abc</sup> | MS + 4 $\mu$ M mT        | 24 | 45.83 <sup>abc</sup> |
| MS + 4 $\mu$ M TDZ       | 24 | 45.83 <sup>abc</sup> | MS + 8 $\mu$ M BA        | 24 | 45.83 <sup>abc</sup> |
| DKW + 8 $\mu$ M TDZ      | 24 | 41.67 <sup>abc</sup> | DKW + 8 $\mu$ M TDZ      | 24 | 41.67 <sup>abc</sup> |
| DKW + 1 $\mu$ M TDZ      | 24 | 41.67 <sup>abc</sup> | DKW + 2 $\mu$ M TDZ      | 24 | 41.67 <sup>abc</sup> |
| DKW + 2 $\mu$ M BA       | 24 | 41.67 <sup>abc</sup> | DKW + 2 $\mu$ M BA       | 24 | 41.67 <sup>abc</sup> |
| WPM + 2 $\mu$ M BA       | 24 | 41.67 <sup>abc</sup> | WPM + 8 $\mu$ M BA       | 24 | 41.67 <sup>abc</sup> |
| DKW + 2 $\mu$ M TDZ      | 24 | 37.50 <sup>abc</sup> | MS + 4 $\mu$ M TDZ       | 24 | 41.67 <sup>abc</sup> |
| WPM + 8 $\mu$ M TDZ      | 24 | 37.50 <sup>abc</sup> | DKW + 2 $\mu$ M mT       | 24 | 37.50 <sup>abc</sup> |
| WPM + 2 $\mu$ M TDZ      | 24 | 37.50 <sup>abc</sup> | DKW + 1 $\mu$ M TDZ      | 24 | 37.50 <sup>abc</sup> |
| MS + 8 $\mu$ M mT        | 24 | 37.50 <sup>abc</sup> | DKW + 1 $\mu$ M BA       | 24 | 37.50 <sup>abc</sup> |
| MS + 2 $\mu$ M TDZ       | 24 | 37.50 <sup>abc</sup> | WPM + 1 $\mu$ M mT       | 24 | 37.50 <sup>abc</sup> |

|                     |    |                      |                     |    |                      |
|---------------------|----|----------------------|---------------------|----|----------------------|
| MS + 4 $\mu$ M BA   | 24 | 37.50 <sup>abc</sup> | WPM + 2 $\mu$ M TDZ | 24 | 37.50 <sup>abc</sup> |
| DKW + 2 $\mu$ M mT  | 24 | 33.33 <sup>abc</sup> | MS + 8 $\mu$ M mT   | 24 | 37.50 <sup>abc</sup> |
| DKW + 1 $\mu$ M BA  | 24 | 33.33 <sup>abc</sup> | MS + 2 $\mu$ M mT   | 24 | 37.50 <sup>abc</sup> |
| WPM + 2 $\mu$ M mT  | 24 | 33.33 <sup>abc</sup> | MS + 8 $\mu$ M TDZ  | 24 | 37.50 <sup>abc</sup> |
| WPM + 1 $\mu$ M TDZ | 24 | 33.33 <sup>abc</sup> | MS + 2 $\mu$ M TDZ  | 24 | 37.50 <sup>abc</sup> |
| MS + 2 $\mu$ M mT   | 24 | 33.33 <sup>abc</sup> | MS + 2 $\mu$ M BA   | 24 | 37.50 <sup>abc</sup> |
| MS + 8 $\mu$ M TDZ  | 24 | 33.33 <sup>abc</sup> | DKW + 1 $\mu$ M mT  | 24 | 33.33 <sup>abc</sup> |
| MS + 1 $\mu$ M TDZ  | 24 | 33.33 <sup>abc</sup> | WPM + 2 $\mu$ M mT  | 24 | 33.33 <sup>abc</sup> |
| MS + 2 $\mu$ M BA   | 24 | 33.33 <sup>abc</sup> | WPM + 1 $\mu$ M TDZ | 24 | 33.33 <sup>abc</sup> |
| DKW + 1 $\mu$ M mT  | 24 | 29.17 <sup>bc</sup>  | WPM + 2 $\mu$ M BA  | 24 | 33.33 <sup>abc</sup> |
| WPM + 1 $\mu$ M mT  | 24 | 29.17 <sup>bc</sup>  | WPM + 1 $\mu$ M BA  | 24 | 33.33 <sup>abc</sup> |
| WPM + 1 $\mu$ M BA  | 24 | 29.17 <sup>bc</sup>  | MS + 1 $\mu$ M TDZ  | 24 | 33.33 <sup>abc</sup> |
| MS + 1 $\mu$ M mT   | 24 | 29.17 <sup>bc</sup>  | DKW + No PGR        | 24 | 29.17 <sup>abc</sup> |
| MS + 1 $\mu$ M BA   | 24 | 29.17 <sup>bc</sup>  | MS + 1 $\mu$ M mT   | 24 | 29.17 <sup>abc</sup> |
| DKW + No PGR        | 24 | 25.00 <sup>c</sup>   | MS + 1 $\mu$ M BA   | 24 | 25.00 <sup>bc</sup>  |
| WPM + No PGR        | 24 | 25.00 <sup>c</sup>   | WPM + No PGR        | 24 | 20.83 <sup>c</sup>   |
| MS + No PGR         | 24 | 20.83 <sup>c</sup>   | MS + No PGR         | 24 | 20.83 <sup>c</sup>   |

MS: Murashige and Skoog medium, WPM: wood plant medium, DKW: Driver and Kuniyaki Walnut medium, No PGR: control, BA: 6-benzylaminopurine, TDZ: thidiazuron, mT: meta-topolin [6-(3-hydroxybenzylamino)purine].

**Table S2.** The effect of medium and plant growth regulator type and their concentrations on the average number of shoots per *Juniperus drupacea*'s explant in relation to their gender. (Means followed by the same letter do not differ statistically at  $p \leq 0.05$  according to Duncan test.)

| Female explants          |    |                      | Male explants            |    |                        |
|--------------------------|----|----------------------|--------------------------|----|------------------------|
| Medium and PGR treatment | N  |                      | Medium and PGR treatment | N  |                        |
| DKW + 4 $\mu$ M mT       | 24 | 1.17 <sup>a</sup>    | DKW + 4 $\mu$ M TDZ      | 24 | 1.17 <sup>a</sup>      |
| DKW + 4 $\mu$ M TDZ      | 24 | 1.17 <sup>a</sup>    | DKW + 4 $\mu$ M mT       | 24 | 1.08 <sup>ab</sup>     |
| WPM + 4 $\mu$ M TDZ      | 24 | 1.08 <sup>a</sup>    | DKW + 4 $\mu$ M BA       | 24 | 1.00 <sup>abc</sup>    |
| MS + 4 $\mu$ M mT        | 24 | 1.08 <sup>a</sup>    | WPM + 4 $\mu$ M mT       | 24 | 1.00 <sup>abc</sup>    |
| WPM + 4 $\mu$ M mT       | 24 | 1.04 <sup>ab</sup>   | MS + 4 $\mu$ M BA        | 24 | 1.00 <sup>abc</sup>    |
| WPM + 4 $\mu$ M BA       | 24 | 1.04 <sup>ab</sup>   | WPM + 4 $\mu$ M TDZ      | 24 | 0.96 <sup>abcd</sup>   |
| MS + 4 $\mu$ M TDZ       | 24 | 1.00 <sup>abc</sup>  | MS + 4 $\mu$ M mT        | 24 | 0.96 <sup>abcd</sup>   |
| DKW + 4 $\mu$ M BA       | 24 | 0.92 <sup>abcd</sup> | MS + 4 $\mu$ M TDZ       | 24 | 0.88 <sup>abcd</sup>   |
| WPM + 8 $\mu$ M mT       | 24 | 0.92 <sup>abcd</sup> | DKW + 8 $\mu$ M mT       | 24 | 0.83 <sup>abcdef</sup> |
| DKW + 8 $\mu$ M mT       | 24 | 0.88 <sup>abcd</sup> | DKW + 8 $\mu$ M BA       | 24 | 0.83 <sup>abcdef</sup> |
| DKW + 8 $\mu$ M TDZ      | 24 | 0.88 <sup>abcd</sup> | WPM + 4 $\mu$ M BA       | 24 | 0.83 <sup>abcdef</sup> |
| DKW + 8 $\mu$ M BA       | 24 | 0.88 <sup>abcd</sup> | MS + 8 $\mu$ M TDZ       | 24 | 0.79 <sup>abcdef</sup> |
| DKW + 2 $\mu$ M BA       | 24 | 0.79 <sup>abcd</sup> | DKW + 2 $\mu$ M mT       | 24 | 0.71 <sup>abcdef</sup> |
| MS + 4 $\mu$ M BA        | 24 | 0.79 <sup>abcd</sup> | DKW + 8 $\mu$ M TDZ      | 24 | 0.71 <sup>abcdef</sup> |
| DKW + 1 $\mu$ M TDZ      | 24 | 0.75 <sup>abcd</sup> | WPM + 8 $\mu$ M mT       | 24 | 0.71 <sup>abcdef</sup> |
| WPM + 8 $\mu$ M TDZ      | 24 | 0.75 <sup>abcd</sup> | MS + 8 $\mu$ M mT        | 24 | 0.71 <sup>abcdef</sup> |
| WPM + 2 $\mu$ M BA       | 24 | 0.75 <sup>abcd</sup> | MS + 2 $\mu$ M mT        | 24 | 0.71 <sup>abcdef</sup> |
| MS + 8 $\mu$ M BA        | 24 | 0.75 <sup>abcd</sup> | DKW + 2 $\mu$ M TDZ      | 24 | 0.67 <sup>abcdef</sup> |
| DKW + 2 $\mu$ M TDZ      | 24 | 0.71 <sup>abcd</sup> | DKW + 1 $\mu$ M TDZ      | 24 | 0.67 <sup>abcdef</sup> |

|                |    |                      |                |    |                        |
|----------------|----|----------------------|----------------|----|------------------------|
| WPM + 8 µM BA  | 24 | 0.71 <sup>abcd</sup> | DKW + 2 µM BA  | 24 | 0.67 <sup>abcdef</sup> |
| MS + 8 µM mT   | 24 | 0.71 <sup>abcd</sup> | WPM + 8 µM TDZ | 24 | 0.67 <sup>abcdef</sup> |
| WPM + 2 µM TDZ | 24 | 0.67 <sup>abcd</sup> | MS + 8 µM BA   | 24 | 0.67 <sup>abcdef</sup> |
| MS + 8 µM TDZ  | 24 | 0.67 <sup>abcd</sup> | MS + 2 µM BA   | 24 | 0.67 <sup>abcdef</sup> |
| MS + 2 µM mT   | 24 | 0.63 <sup>abcd</sup> | DKW + 1 µM mT  | 24 | 0.63 <sup>abcdef</sup> |
| MS + 1 µM TDZ  | 24 | 0.63 <sup>abcd</sup> | WPM + 2 µM TDZ | 24 | 0.63 <sup>abcdef</sup> |
| DKW + 2 µM mT  | 24 | 0.58 <sup>abcd</sup> | WPM + 1 µM mT  | 24 | 0.58 <sup>abcdef</sup> |
| WPM + 1 µM TDZ | 24 | 0.58 <sup>abcd</sup> | WPM + 8 µM BA  | 24 | 0.58 <sup>abcdef</sup> |
| MS + 1 µM mT   | 24 | 0.58 <sup>abcd</sup> | WPM + 2 µM BA  | 24 | 0.58 <sup>abcdef</sup> |
| DKW + 1 µM BA  | 24 | 0.54 <sup>abcd</sup> | MS + 2 µM TDZ  | 24 | 0.58 <sup>abcdef</sup> |
| WPM + 2 µM mT  | 24 | 0.54 <sup>abcd</sup> | MS + 1 µM TDZ  | 24 | 0.58 <sup>abcdef</sup> |
| MS + 2 µM TDZ  | 24 | 0.54 <sup>abcd</sup> | DKW + 1 µM BA  | 24 | 0.54 <sup>abcdef</sup> |
| MS + 2 µM BA   | 24 | 0.54 <sup>abcd</sup> | WPM + 2 µM mT  | 24 | 0.54 <sup>abcdef</sup> |
| DKW + 1 µM mT  | 24 | 0.50 <sup>abcd</sup> | WPM + 1 µM TDZ | 24 | 0.54 <sup>abcdef</sup> |
| WPM + 1 µM mT  | 24 | 0.50 <sup>abcd</sup> | WPM + 1 µM BA  | 24 | 0.50 <sup>bcdef</sup>  |
| WPM + 1 µM BA  | 24 | 0.46 <sup>abcd</sup> | MS + 1 µM mT   | 24 | 0.42 <sup>cdef</sup>   |
| MS + 1 µM BA   | 24 | 0.38 <sup>bcd</sup>  | DKW + No PGR   | 24 | 0.33 <sup>def</sup>    |
| DKW + No PGR   | 24 | 0.33 <sup>cd</sup>   | MS + 1 µM BA   | 24 | 0.33 <sup>def</sup>    |
| WPM + No PGR   | 24 | 0.33 <sup>cd</sup>   | MS + No PGR    | 24 | 0.25 <sup>ef</sup>     |
| MS + No PGR    | 24 | 0.29 <sup>d</sup>    | WPM + No PGR   | 24 | 0.21 <sup>f</sup>      |

MS: Murashige and Skoog medium, WPM: wood plant medium, DKW: Driver and Kuniyaki Walnut medium, No PGR: control, BA: 6-benzylaminopurine, TDZ: thidiazuron, mT: meta-topolin [6-(3-hydroxybenzylamino)purine]. Means followed by the same letter do not differ statistically at  $p \leq 0.05$  according to the Duncan test.

**Table S3.** Effect of medium and plant growth regulator types and their concentrations on the average shoot length per *Juniperus drupacea*'s explant in relation to their gender. (Means followed by the same letter do not differ statistically at  $p \leq 0.05$  according to Duncan test.)

| Female explants          |    |                       | Male explants            |    |                      |
|--------------------------|----|-----------------------|--------------------------|----|----------------------|
| Medium and PGR treatment | N  | (mm)                  | Medium and PGR treatment | N  | (mm)                 |
| DKW + 4 µM BA            | 11 | 2.94 <sup>a</sup>     | DKW + 1 µM mT            | 8  | 2.69 <sup>a</sup>    |
| DKW + 4 µM mT            | 13 | 2.90 <sup>ab</sup>    | DKW + 1 µM TDZ           | 9  | 2.67 <sup>a</sup>    |
| DKW + 4 µM TDZ           | 13 | 2.83 <sup>abc</sup>   | WPM + 1 µM TDZ           | 8  | 2.57 <sup>a</sup>    |
| DKW + 2 µM TDZ           | 9  | 2.78 <sup>abcd</sup>  | DKW + 8 µM TDZ           | 10 | 2.53 <sup>ab</sup>   |
| DKW + 2 µM mT            | 8  | 2.75 <sup>abcd</sup>  | WPM + 2 µM BA            | 8  | 2.52 <sup>ab</sup>   |
| WPM + 2 µM mT            | 8  | 2.75 <sup>abcd</sup>  | DKW + 8 µM mT            | 13 | 2.50 <sup>ab</sup>   |
| DKW + 8 µM TDZ           | 10 | 2.73 <sup>abcd</sup>  | MS + 4 µM TDZ            | 10 | 2.50 <sup>ab</sup>   |
| WPM + 4 µM BA            | 13 | 2.62 <sup>abcd</sup>  | MS + 1 µM mT             | 7  | 2.47 <sup>ab</sup>   |
| DKW + 1 µM mT            | 7  | 2.57 <sup>abcde</sup> | WPM + 8 µM BA            | 10 | 2.47 <sup>ab</sup>   |
| DKW + 2 µM BA            | 10 | 2.55 <sup>abcde</sup> | MS + 8 µM TDZ            | 9  | 2.47 <sup>ab</sup>   |
| WPM + 4 µM mT            | 13 | 2.54 <sup>abcde</sup> | WPM + 4 µM mT            | 13 | 2.45 <sup>ab</sup>   |
| WPM + 4 µM TDZ           | 11 | 2.51 <sup>abcde</sup> | WPM + 2 µM TDZ           | 9  | 2.44 <sup>ab</sup>   |
| DKW + 8 µM BA            | 11 | 2.50 <sup>abcde</sup> | MS + 2 µM TDZ            | 9  | 2.44 <sup>ab</sup>   |
| DKW + 1 µM BA            | 8  | 2.50 <sup>abcde</sup> | WPM + 4 µM BA            | 11 | 2.44 <sup>ab</sup>   |
| DKW + 8 µM mT            | 12 | 2.48 <sup>abcde</sup> | DKW + 4 µM TDZ           | 14 | 2.43 <sup>abc</sup>  |
| WPM + 1 µM mT            | 7  | 2.46 <sup>abcde</sup> | WPM + 1 µM mT            | 9  | 2.40 <sup>abcd</sup> |
| MS + 8 µM TDZ            | 8  | 2.44 <sup>abcde</sup> | MS + 8 µM mT             | 9  | 2.40 <sup>abcd</sup> |

|                     |    |                        |                     |    |                        |
|---------------------|----|------------------------|---------------------|----|------------------------|
| MS + 4 $\mu$ M mT   | 11 | 2.44 <sup>abcde</sup>  | MS + 8 $\mu$ M BA   | 11 | 2.38 <sup>abcde</sup>  |
| MS + 2 $\mu$ M mT   | 8  | 2.43 <sup>abcde</sup>  | WPM + 2 $\mu$ M mT  | 8  | 2.38 <sup>abcde</sup>  |
| WPM + 8 $\mu$ M BA  | 11 | 2.41 <sup>abcde</sup>  | DKW + 8 $\mu$ M BA  | 11 | 2.37 <sup>abcde</sup>  |
| MS + 4 $\mu$ M BA   | 9  | 2.39 <sup>abcde</sup>  | DKW + 2 $\mu$ M BA  | 10 | 2.37 <sup>abcdef</sup> |
| MS + 1 $\mu$ M mT   | 7  | 2.39 <sup>abcde</sup>  | DKW + 4 $\mu$ M mT  | 13 | 2.37 <sup>abcdef</sup> |
| WPM + 8 $\mu$ M TDZ | 9  | 2.37 <sup>abcde</sup>  | WPM + 4 $\mu$ M TDZ | 12 | 2.36 <sup>abcdef</sup> |
| DKW + 1 $\mu$ M TDZ | 10 | 2.35 <sup>abcde</sup>  | WPM + 1 $\mu$ M BA  | 8  | 2.34 <sup>abcde</sup>  |
| WPM + 2 $\mu$ M BA  | 10 | 2.35 <sup>abcde</sup>  | DKW + 2 $\mu$ M mT  | 9  | 2.33 <sup>abcde</sup>  |
| MS + 4 $\mu$ M TDZ  | 11 | 2.35 <sup>abcde</sup>  | MS + 2 $\mu$ M BA   | 9  | 2.33 <sup>abcde</sup>  |
| WPM + 8 $\mu$ M mT  | 12 | 2.33 <sup>abcde</sup>  | MS + 2 $\mu$ M mT   | 9  | 2.31 <sup>abcde</sup>  |
| MS + 8 $\mu$ M mT   | 9  | 2.32 <sup>abcde</sup>  | DKW + 4 $\mu$ M BA  | 15 | 2.30 <sup>abcdef</sup> |
| WPM + 2 $\mu$ M TDZ | 9  | 2.27 <sup>abcdef</sup> | DKW + 2 $\mu$ M TDZ | 10 | 2.23 <sup>abcdef</sup> |
| MS + 2 $\mu$ M TDZ  | 9  | 2.27 <sup>abcdef</sup> | MS + 4 $\mu$ M BA   | 12 | 2.22 <sup>abcdef</sup> |
| WPM + 1 $\mu$ M TDZ | 8  | 2.24 <sup>abcdef</sup> | MS + 1 $\mu$ M TDZ  | 8  | 2.19 <sup>abcdef</sup> |
| MS + 1 $\mu$ M TDZ  | 8  | 2.20 <sup>abcdef</sup> | MS + 1 $\mu$ M BA   | 6  | 2.18 <sup>abcdef</sup> |
| MS + 2 $\mu$ M BA   | 6  | 2.18 <sup>abcdef</sup> | WPM + 8 $\mu$ M TDZ | 11 | 2.18 <sup>abcdef</sup> |
| WPM + 1 $\mu$ M BA  | 7  | 2.14 <sup>bcdef</sup>  | MS + 4 $\mu$ M mT   | 11 | 2.11 <sup>bcdef</sup>  |
| MS + 8 $\mu$ M BA   | 12 | 2.13 <sup>cdef</sup>   | WPM + 8 $\mu$ M mT  | 12 | 2.10 <sup>bcdef</sup>  |
| MS + 1 $\mu$ M BA   | 5  | 2.04 <sup>def</sup>    | WPM + No PGR        | 5  | 1.90 <sup>cdef</sup>   |
| DKW + No PGR        | 6  | 1.83 <sup>efg</sup>    | DKW + 1 $\mu$ M BA  | 9  | 1.89 <sup>def</sup>    |
| WPM + No PGR        | 6  | 1.58 <sup>fg</sup>     | DKW + No PGR        | 7  | 1.86 <sup>bcdef</sup>  |
| MS + No PGR         | 6  | 1.33 <sup>g</sup>      | MS + No PGR         | 5  | 1.80 <sup>bcdef</sup>  |

MS: Murashige and Skoog medium, WPM: wood plant medium, DKW: Driver and Kuniyaki Walnut medium, No PGR: control, BA: 6-benzylaminopurine, TDZ: thidiazuron, mT: meta-topolin [6-(3-hydroxybenzylamino)purine]. Means followed by the same letter do not differ statistically at  $p \leq 0.05$  according to the Duncan test.
